# Supplementary material
Source: publisher figshare collection journal article supplement (https://tandf.figshare.com/ndownloader/files/31585466)
Supplement: Supplementary file 1 [file 31585466]

SUPPLEMENTARY MATERIAL

Four pair of enantiomeric benzofuran lignans from the fruits of *Crataegus pinnatifida* Bunge

Ding-Ding Zhang a, 1, Peng Zhao a, 1, Shun-Wang Huang b, Shao-Jiang Song a, Xiao-Xiao Huang a, *

*a Key Laboratory of Computational Chemistry-Based Natural Antitumor Drug Research & Development, Liaoning Province, School of Traditional Chinese Materia Medica, Shenyang Pharmaceutical University, Shenyang 110016, China*

*b Hefei Innovative Pharmaceutical Technology Co., Ltd., Anhui, Hefei, 230088, China*

1These authors contributed equally to this study.

*Corresponding author.

Email: [xiaoxiao270@163.com](mailto:xiaoxiao270@163.com)

**Abstract:** Phytochemical investigation of the fruits of *Crataegus pinnatifida* Bunge led to the isolation of four pairs enantiomeric benzofuran lignans (**1a**/**1b**-**4a**/**4b**) including four undescribed compounds (**1a**, **2b**, **3b** and **4b**). Their structures were determined by extensive spectroscopic methods and the absolute configurations were further determined by the comparison of experimental and calculated ECD spectra. All the enantiomeric lignans were evaluated for their inhibitory activities to tyrosinase. Among them, compound **4a** showed moderate inhibition activity (IC50 = 0.54 mM).

**Keywords:** *Crataegus pinnatifida* Bunge, benzofuran lignans, chiral resolution, ECD calculation, anti-tyrosinase activities

**Description of drawings**

[**Table S1** 1H (600 MHz) and 13C NMR (150 MHz) spectral data for **1**-**4** (CDCl3). 4](#__RefHeading___Toc81245307)

[**Fig. S1** Key HMBC correlations of compounds **1**–**4**. 5](#__RefHeading___Toc81245308)

[**Fig. S2** IC50 values of tyrosinase inhibition of compounds **1a**-**4b**. 5](#__RefHeading___Toc81245309)

[**Fig. S3** Calculated and experimental ECD spectra of **1a**/**1b**-**4a**/**4b**. 6](#__RefHeading___Toc81245310)

[**Fig. S4** 1H-NMR spectrum of compound **1** (600MHz, CDCl3) 6](#__RefHeading___Toc81245311)

[**Fig. S5** 13C-NMR spectrum of compound **1** (150 MHz, CDCl3) 7](#__RefHeading___Toc81245312)

[**Fig. S6** HSQC spectrum of compound **1** (150 MHz, CDCl3) 7](#__RefHeading___Toc81245313)

[**Fig. S7** HMBC spectrum of compound **1** (150 MHz, CDCl3) 8](#__RefHeading___Toc81245314)

[**Fig. S8** NOESY spectrum of compound **1** (150 MHz, CDCl3) 8](#__RefHeading___Toc81245315)

[**Fig. S9** UV spectrum of compound **1**………………………………………………………….9](#__RefHeading___Toc81245316)

[**Fig. S10** MS spectrum of compound **1**…………………………………………………….....10](#__RefHeading___Toc81245317)

[**Fig. S11** Experimental ECD spectrum of **1a**…………………………………………………11](#__RefHeading___Toc81245318)

[**Fig. S12** Experimental ECD spectrum of **1b**……………………………………...………….11](#__RefHeading___Toc81245319)

[**Fig. S13** HPLC chromatographic profile and purity report of compound **1** 12](#__RefHeading___Toc81245347)

[**Fig. S14** 1H-NMR spectrum of compound **2** (600MHz, CDCl3) 12](#__RefHeading___Toc81245320)

[**Fig. S15** 13C-NMR spectrum of compound **2** (150MHz, CDCl3) 13](#__RefHeading___Toc81245321)

[**Fig. S16** HSQC spectrum of compound **2** (150 MHz, CDCl3) 13](#__RefHeading___Toc81245322)

[**Fig. S17** HMBC spectrum of compound **2** (150 MHz, CDCl3) 14](#__RefHeading___Toc81245323)

[**Fig. S18** NOESY spectrum of compound **2** (150 MHz, CDCl3) 14](#__RefHeading___Toc81245324)

[**Fig. S19** UV spectrum of compound **2**……………………………………………………….15](#__RefHeading___Toc81245325)

[**Fig. S20** MS spectrum of compound **2**……………………………………………………….16](#__RefHeading___Toc81245326)

[**Fig. S21** Experimental ECD spectrum of **2a**………………………………………...……….16](#__RefHeading___Toc81245327)

[**Fig. S22** Experimental ECD spectrum of **2b**……………………………………...………….17](#__RefHeading___Toc81245328)

[**Fig. S23** HPLC chromatographic profile and purity report of compound **2** 17](#__RefHeading___Toc81245347)

[**Fig. S24** 1H-NMR spectrum of compound **3** (600MHz, CDCl3) 18](#__RefHeading___Toc81245329)

[**Fig. S25** 13C-NMR spectrum of compound **3** (150MHz, CDCl3) 18](#__RefHeading___Toc81245330)

[**Fig. S26** HSQC spectrum of compound **3** (150MHz, CDCl3) 19](#__RefHeading___Toc81245331)

[**Fig. S27** HMBC spectrum of compound **3** (150MHz, CDCl3) 19](#__RefHeading___Toc81245332)

[**Fig. S28** NOESY spectrum of compound **3** (150MHz, CDCl3) 20](#__RefHeading___Toc81245333)

[**Fig. S29** UV spectrum of compound **3**……………………………………………………….21](#__RefHeading___Toc81245334)

[**Fig. S30** MS spectrum of compound **3**……………………………………………………….22](#__RefHeading___Toc81245335)

[**Fig. S31** Experimental ECD spectrum of **3a**…………………………………………………23](#__RefHeading___Toc81245336)

[**Fig. S32** Experimental ECD spectrum of **3b**……………………………………...……….…23](#__RefHeading___Toc81245337)

[**Fig. S33** HPLC chromatographic profile and purity report of compound **4** 24](#__RefHeading___Toc81245347)

[**Fig. S34** 1H-NMR spectrum of compound **4** (600MHz, CDCl3) 24](#__RefHeading___Toc81245338)

[**Fig. S35** 13 C-NMR spectrum of compound **4** (150 MHz, CDCl3) 25](#__RefHeading___Toc81245339)

[**Fig. S36** HSQC spectrum of compound **4** (150 MHz, CDCl3) 25](#__RefHeading___Toc81245340)

[**Fig. S37** HMBC spectrum of compound **4** (150MHz, CDCl3) 26](#__RefHeading___Toc81245341)

[**Fig. S38** NOESY spectrum of compound **4** (150MHz, CDCl3) 26](#__RefHeading___Toc81245342)

[**Fig. S39** UV spectrum of compound **4**……………………………………………………….27](#__RefHeading___Toc81245343)

[**Fig. S40** UV spectrum of compound **4**……………………………………………………….28](#__RefHeading___Toc81245344)

[**Fig. S41** Experimental ECD spectrum of **4a**…………………………………………………29](#__RefHeading___Toc81245345)

[**Fig. S42** Experimental ECD spectrum of **4b**……………………………...……………….…29](#__RefHeading___Toc81245346)

[**Fig. S43** HPLC chromatographic profile and purity report of compound **4** 30](#__RefHeading___Toc81245347)

**Table S1** 1H (600 MHz) and 13C NMR (150 MHz) spectral data for **1**-**4** (CDCl3).

|  | **1** | | **2** | | **3** | | **4** | |
| --- | --- | --- | --- | --- | --- | --- | --- | --- |
| position | *δ*H | *δ*C | *δ*H | *δ*C | *δ*H | *δ*C | *δ*H | *δ*C |
| 1 | - | 133.1 | - | 132.3 | - | 132.4 | - | 133.2 |
| 2 | 6.90 (dd 1.7) | 108.8 | 6.89 (br s) | 108.9 | 6.90 (overlap) | 108.8 | 6.93 (d, 1.8) | 108.9 |
| 3 | - | 148.1 | - | 146.9 | - | 146.9 | - | 146.8 |
| 4 | - | 146.8 | - | 146.2 | - | 146.1 | - | 145.8 |
| 5 | 6.88 (overlap) | 114.4 | 6.89 (br s) | 114.6 | 6.90 (overlap) | 114.6 | 6.87 (m) | 114.4 |
| 6 | 6.92 (dd 1.7, 7.4) | 119.6 | 6.89 (br s) | 118.3 | 6.90 (overlap) | 118.5 | 6.90 (dd, 1.8, 8.2) | 119.6 |
| 7 | 5.58 | 88.2 | 5.67 (d *J* = 7.1 Hz) | 89.4 | 5.67 (d, 7.1) | 89.3 | 5.51 (d 7.4) | 87.8 |
| 8 | 3.64 (m) | 53.8 | 3.68 (m) | 53.1 | 3.69 (dd, 6.0, 12.1) | 53.1 | 3.58 (m) | 54.1 |
| 9 | 3.92 (m)  3.98 (m) | 64.1 | 3.98 (m) | 64.1 | 3.97 (m) | 64.1 | 3.96 (dd, 5.8, 11.0)  3.89 (m) | 64.0 |
| 1' | - | 134.6 | - | 128.4 | - | 131.9 | - | 128.0 |
| 2' | 6.87 (overlap) | 111.6 | 7.52 (br s) | 112.4 | 7.52 (s) | 112.4 | 6.34 (d, 1.7) | 102.7 |
| 3' | - | 144.6 | - | 144.7 | - | 144.5 | - | 144.8 |
| 4' | - | 146.8 | - | 153.4 | - | 153.0 | - | 150.8 |
| 5' | - | 134.6 | - | 131.4 | - | 128.1 | - | 133.2 |
| 6' | 6.87 (overlap) | 115.4 | 7.54 (br s) | 119.6 | 7.52 (br s) | 119.6 | 6.39 (d, 2.4) | 100.7 |
| 7' | 4.64 (s) | 65.7 | - | 198.9 | - | 196.7 |  |  |
| 8' |  |  | 3.19 (td 2.3, 5.1) | 40.2 | - | - |  |  |
| 9' | - | - | 4.01 (m) | 58.5 | - | - | - | - |
| 7'-Me | - | - | - | - | 2.58 (s) | 26.6 | - | - |
| 3-OCH3 | 3.87 (3H, s) | 56.0 | 3.87 (3H, s) | 56.2 | 3.87 (3H, s) | 56.1 | 3.87 (3H, s) | 56.2 |
| 3'-OCH3 | 3.91 (3H, s) | 56.0 | 3.94 (3H, s) | 56.3 | 3.95 (3H, s) | 56.3 | 3.86 (3H, s) | 56.1 |

Fig. S1 Key HMBC correlations of compounds 1–4.


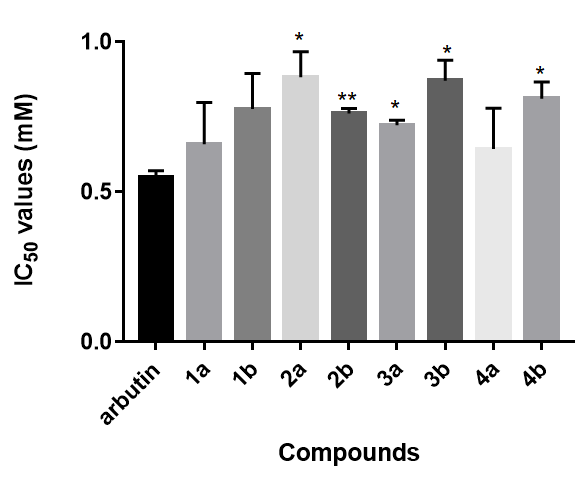


Fig. S2 IC50 values of tyrosinase inhibition of compounds 1a-4b. Notes: all experiments were conducted in triplicate, and the results were expressed as mean ± SD. The control group was treated with arbutin. **p* < 0.05, ***p* < 0.01 vs the arbutin.


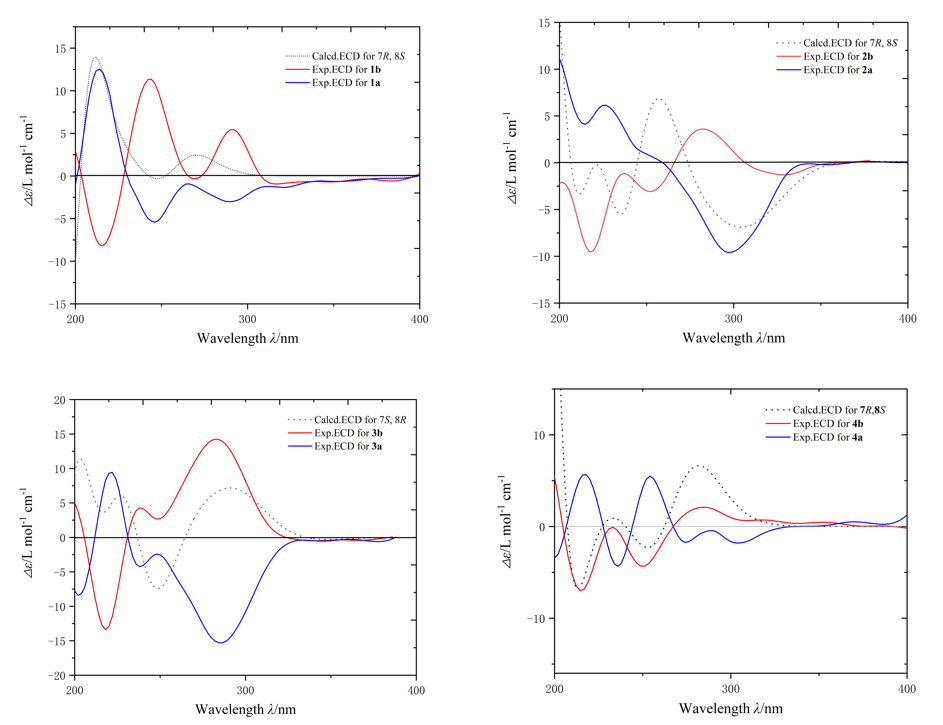


Fig. S3 Calculated and experimental ECD spectra of 1a/1b-4a/4b


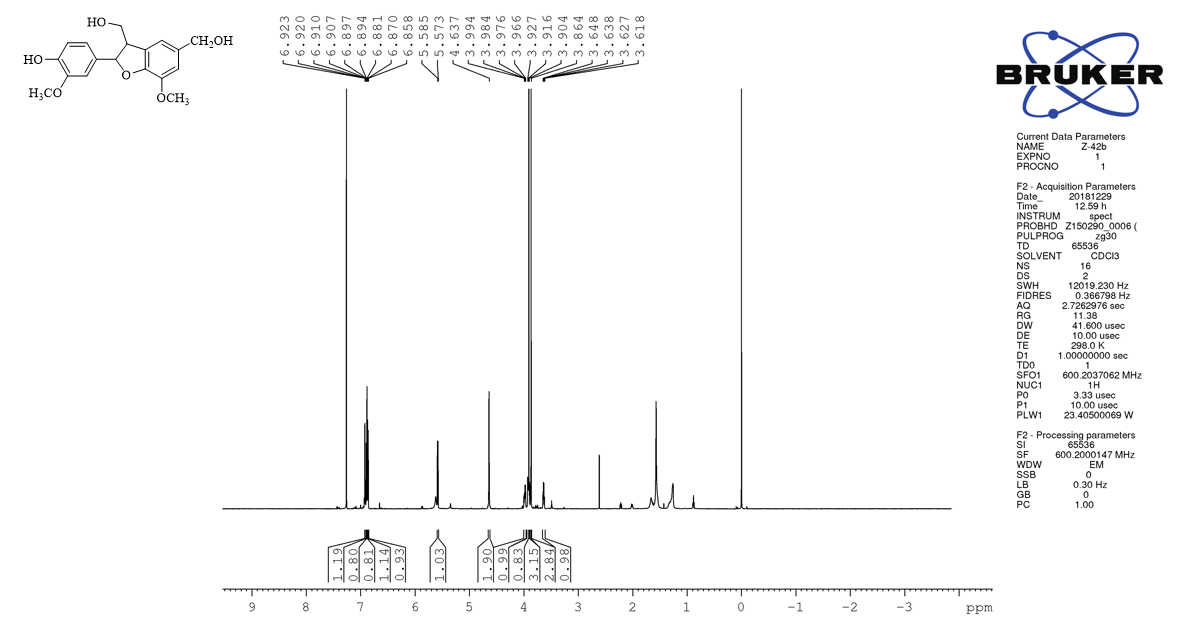


Fig. S4 1H-NMR spectrum of compound 1 (600MHz, CDCl3)


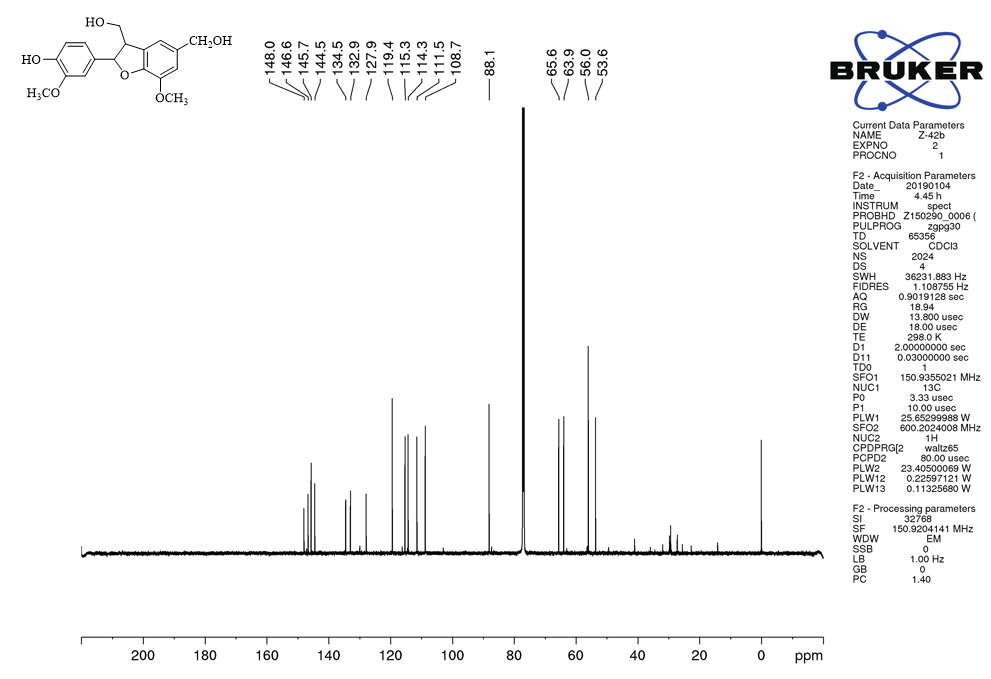


Fig. S5 13C-NMR spectrum of compound 1 (150 MHz, CDCl3)


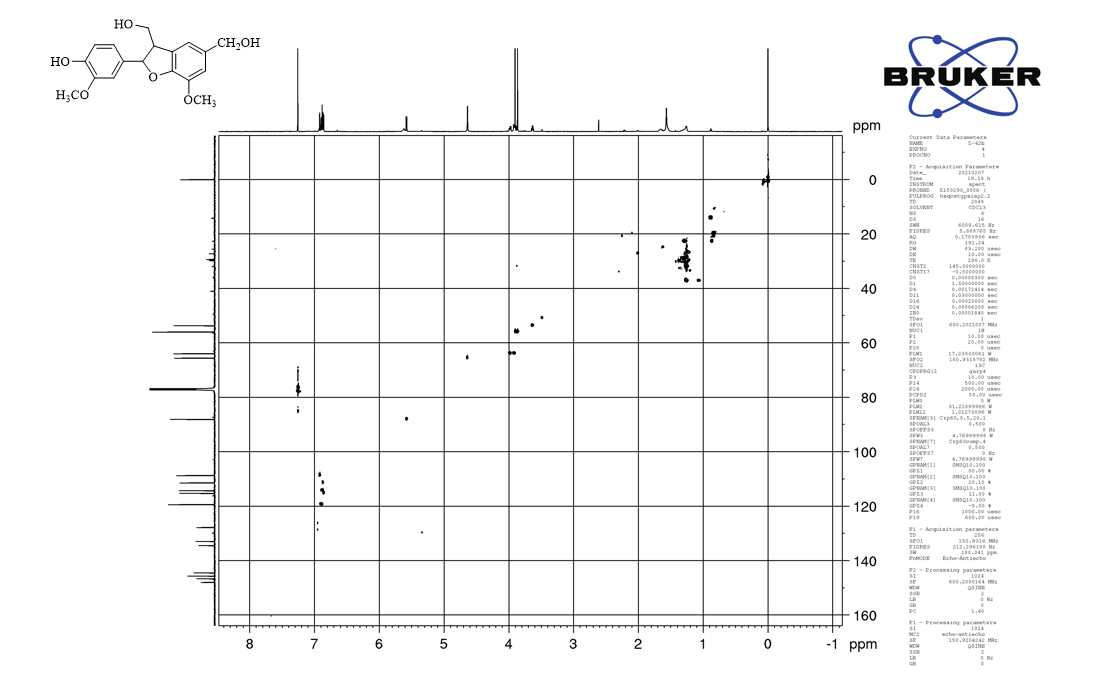


Fig. S6 HSQC spectrum of compound 1 (150 MHz, CDCl3)


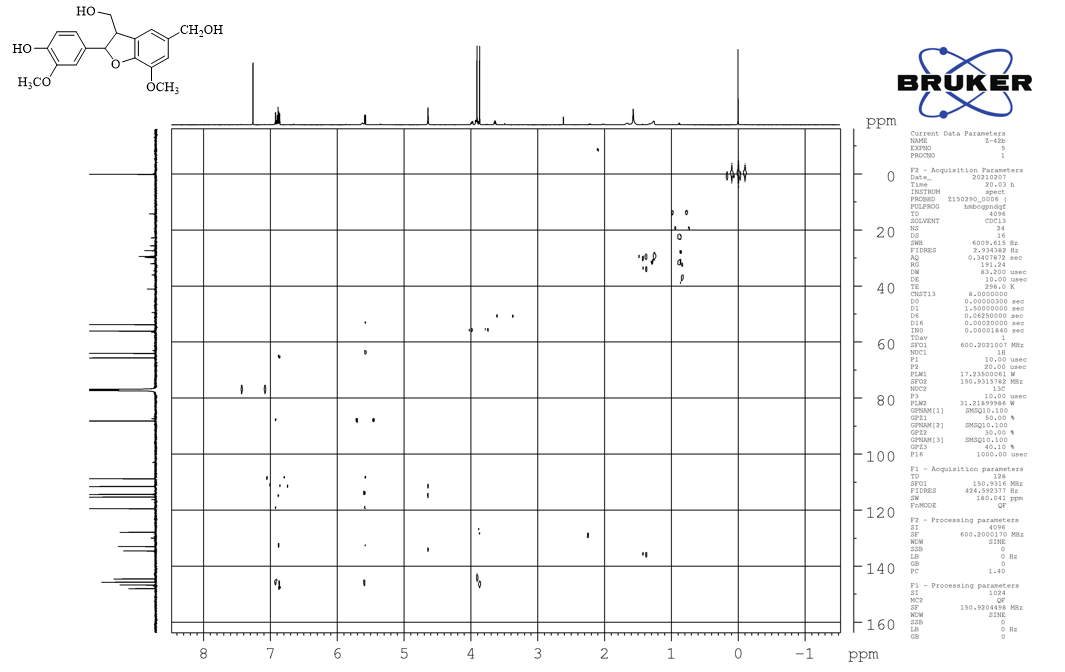


Fig. S7 HMBC spectrum of compound 1 (150 MHz, CDCl3)


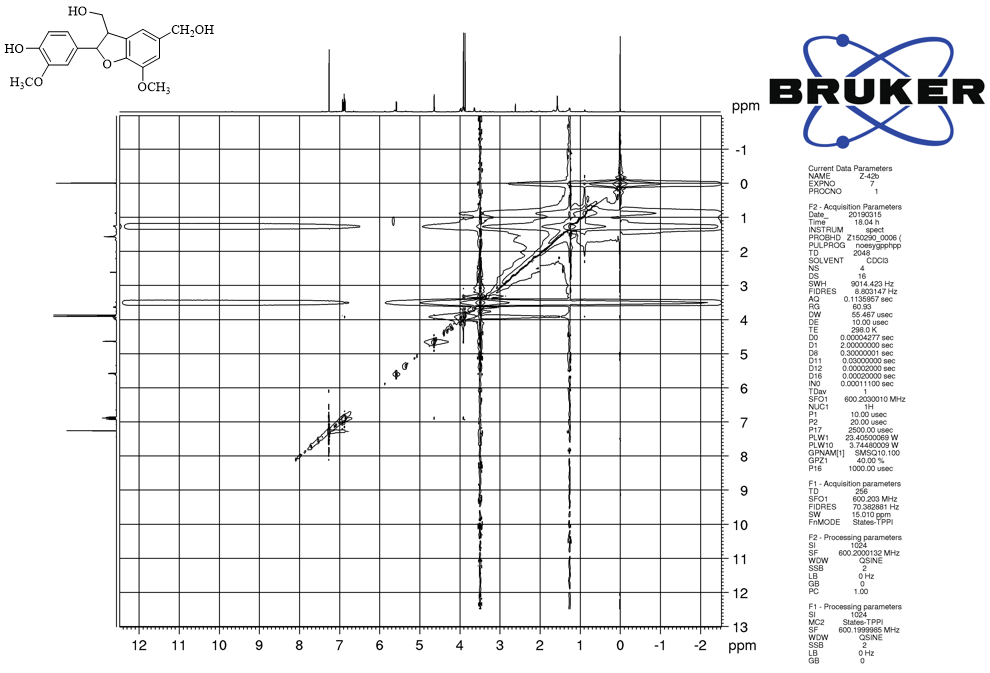


Fig. S8 NOESY spectrum of compound 1 (150 MHz, CDCl3)


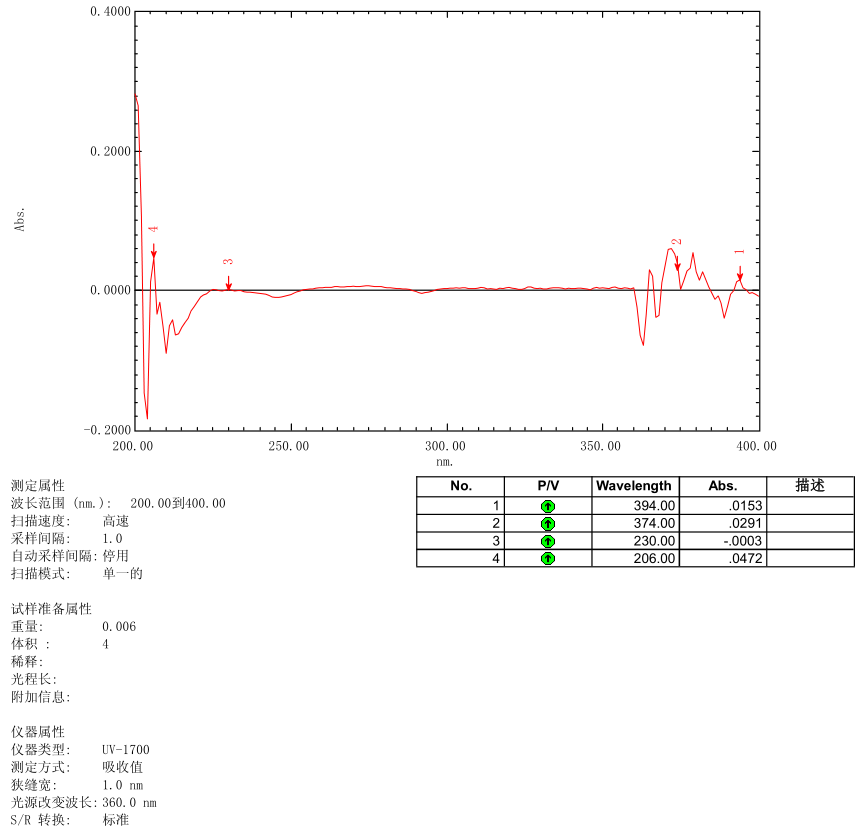


Fig. S9 UV spectrum of compound 1


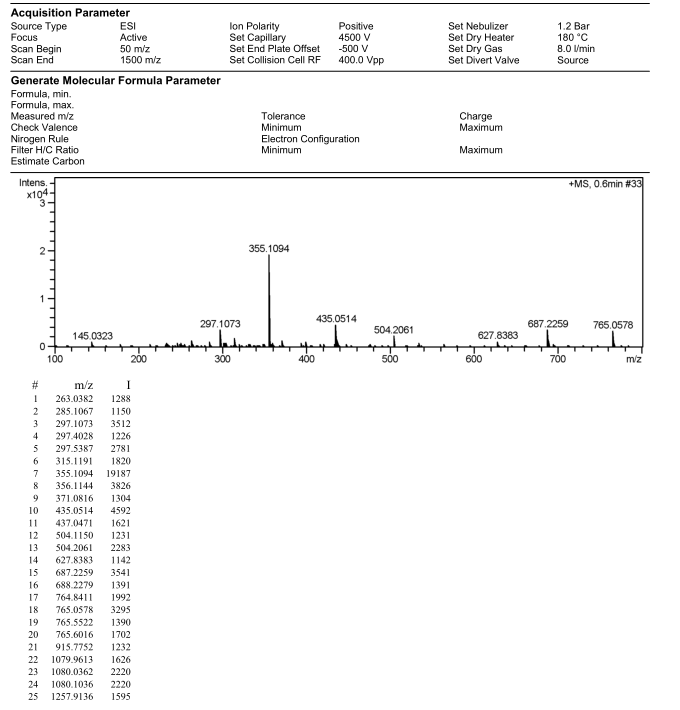


Fig. S10 MS spectrum of compound 1


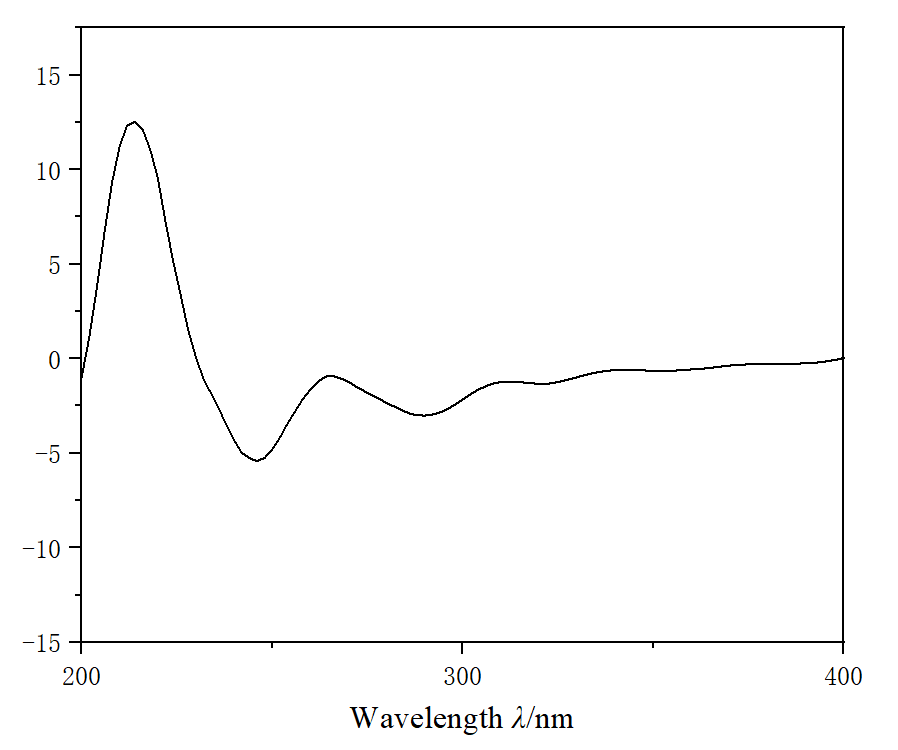


Fig. S11 Experimental ECD spectrum of 1a


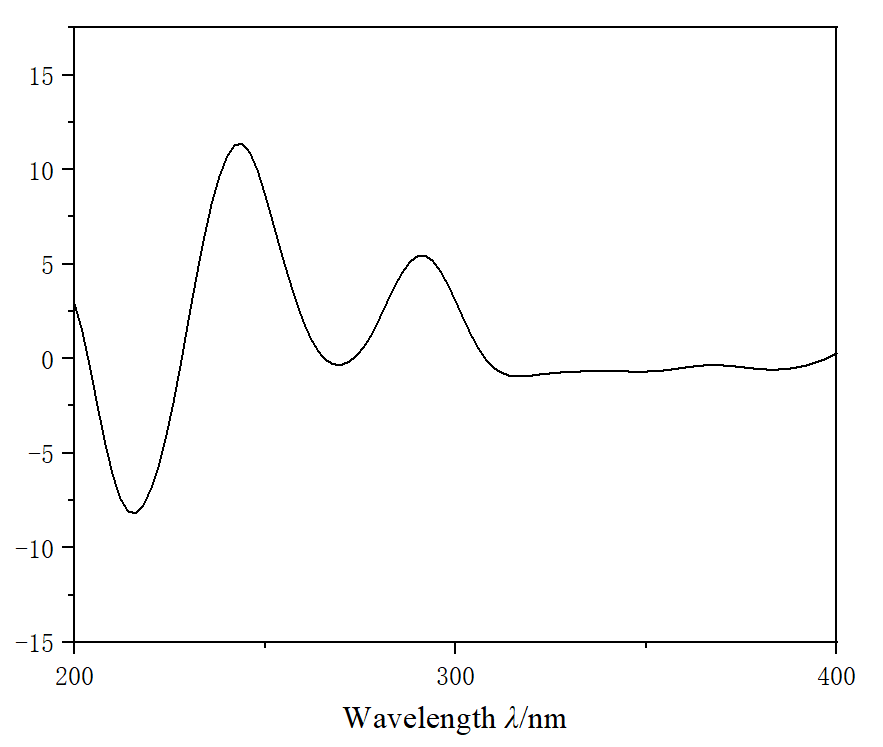


Fig. S12 Experimental ECD spectrum of 1b


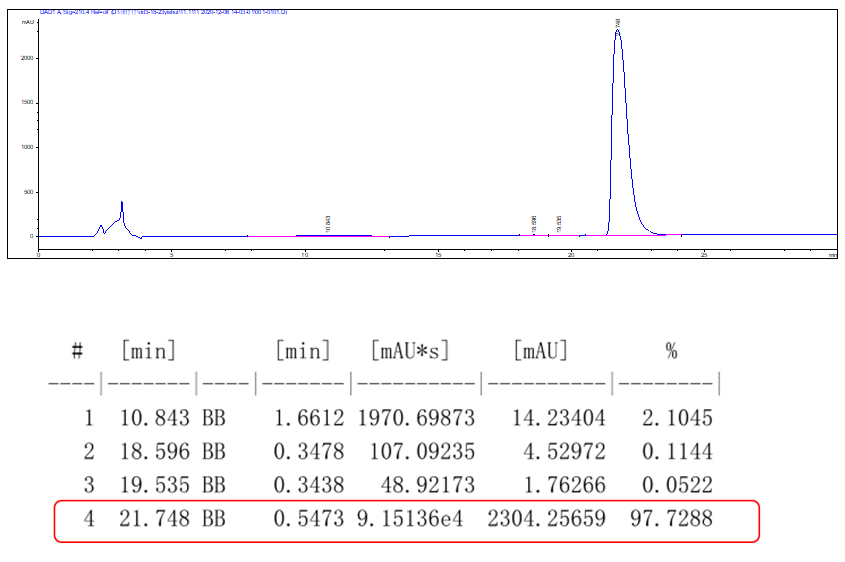


**Fig. S13** HPLC chromatographic profile and purity report of compound **1**


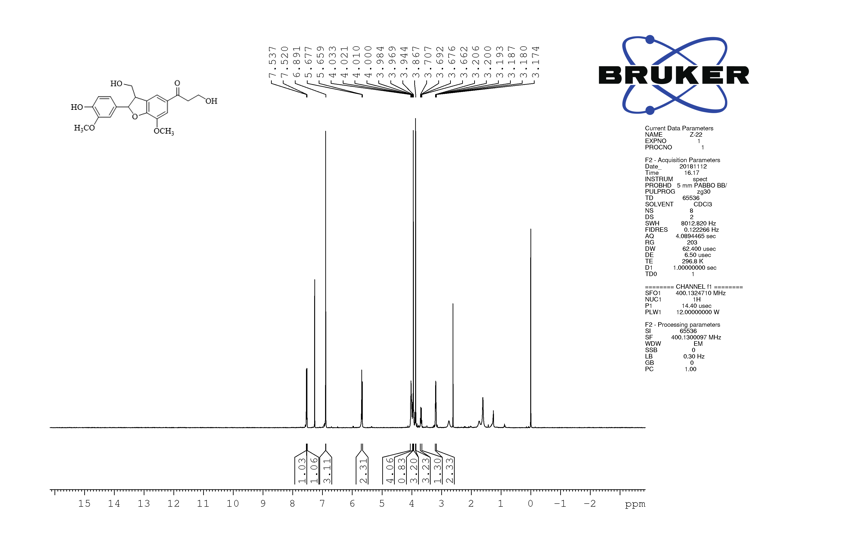


Fig. S14 1H-NMR spectrum of compound 2 (600MHz, CDCl3)


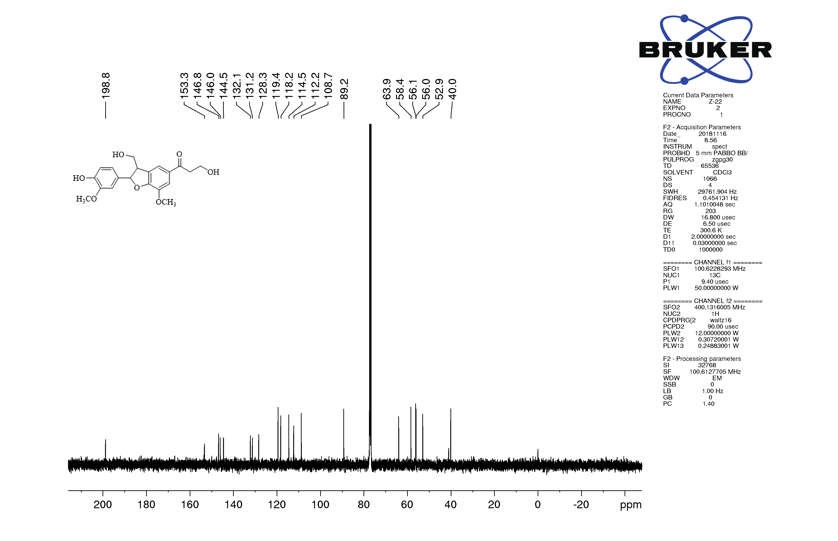


Fig. S15 13C-NMR spectrum of compound 2 (150MHz, CDCl3)


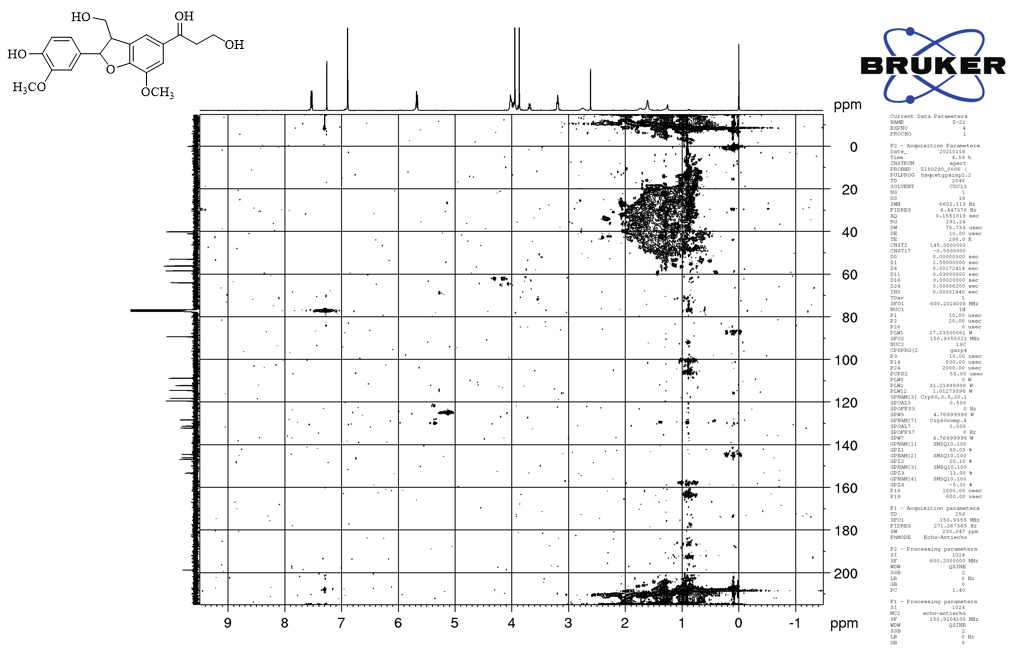


Fig. S16 HSQC spectrum of compound 2 (150 MHz, CDCl3)


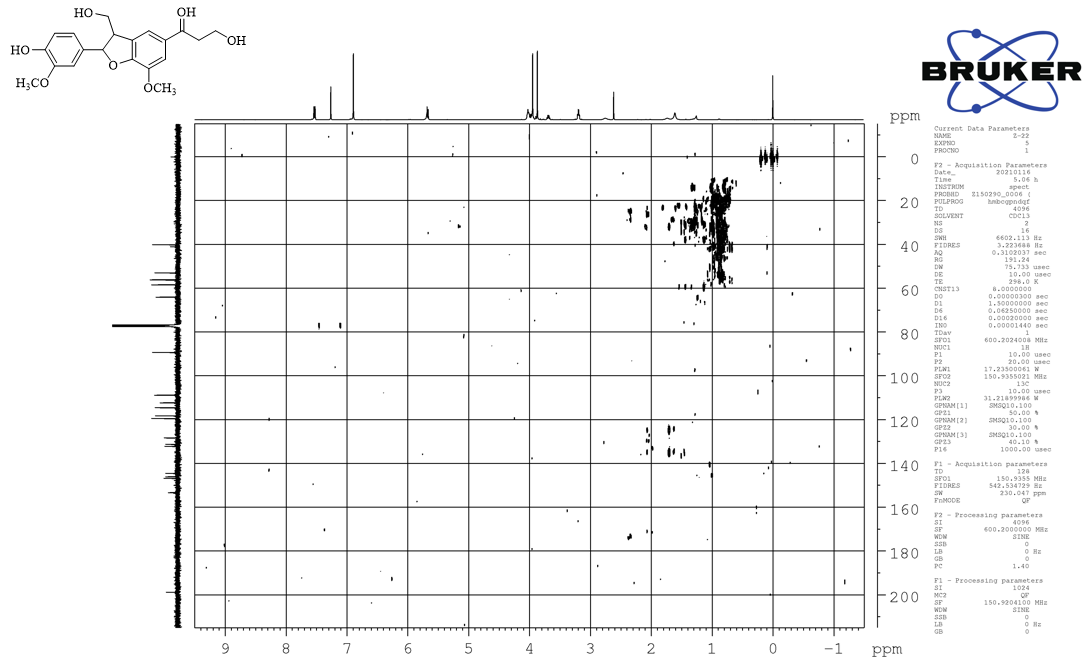


Fig. S17 HMBC spectrum of compound 2 (150 MHz, CDCl3)


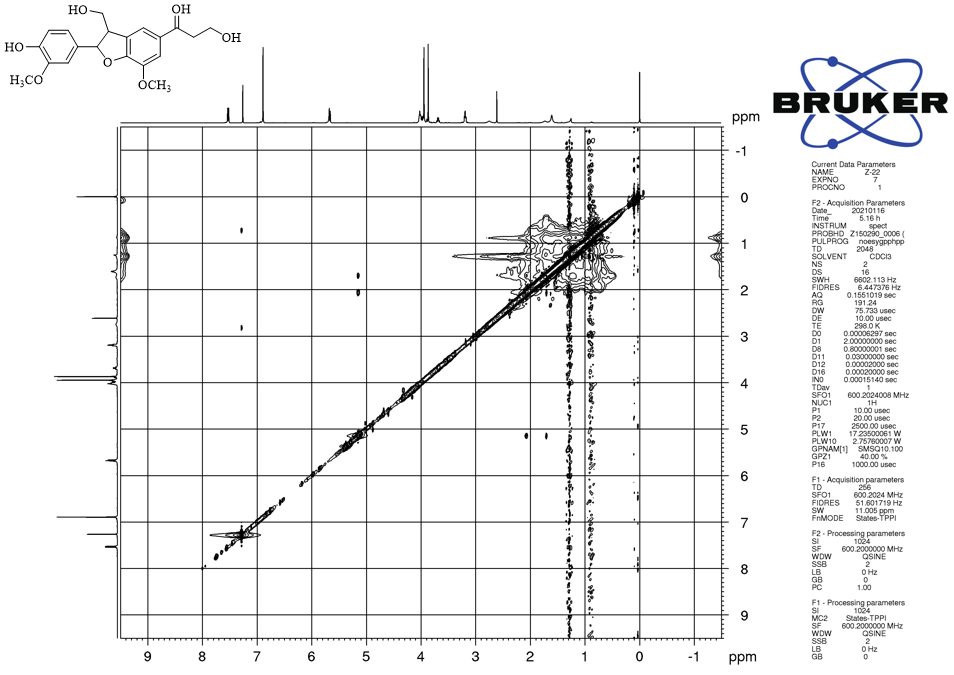


Fig. S18 NOESY spectrum of compound 2 (150 MHz, CDCl3)


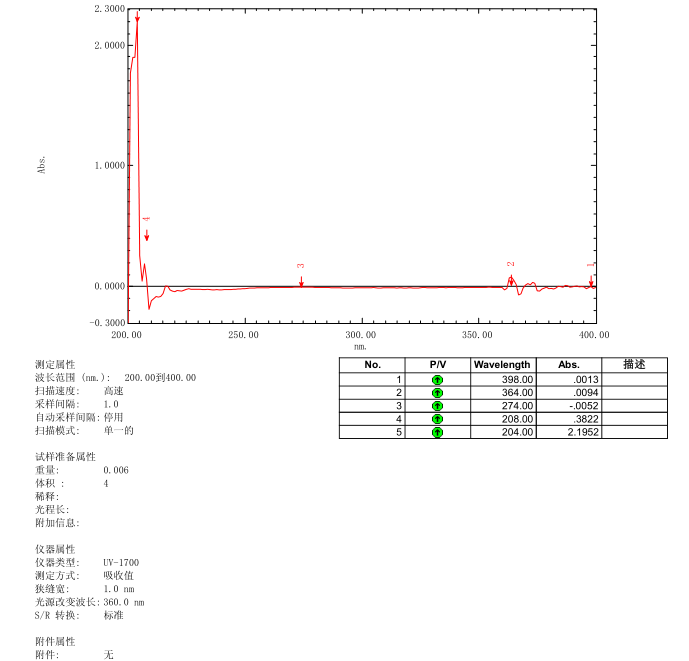


Fig. S19 UV spectrum of compound 2


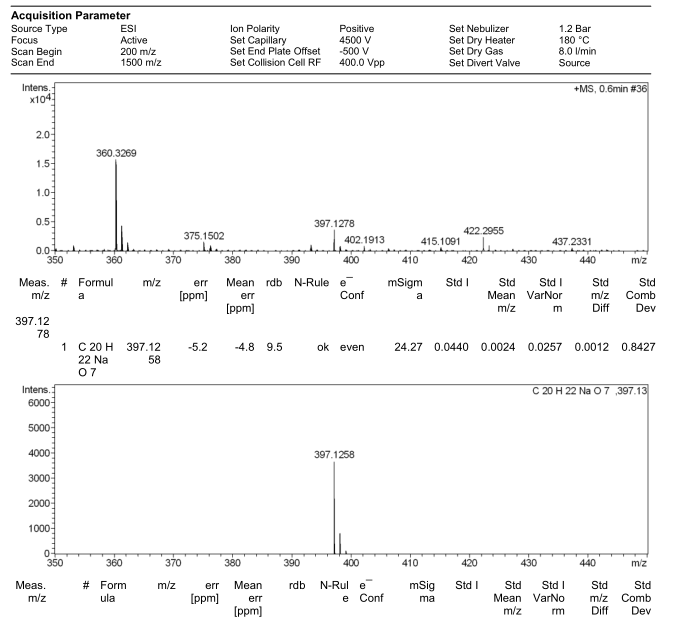


Fig. S20 MS spectrum of compound 2


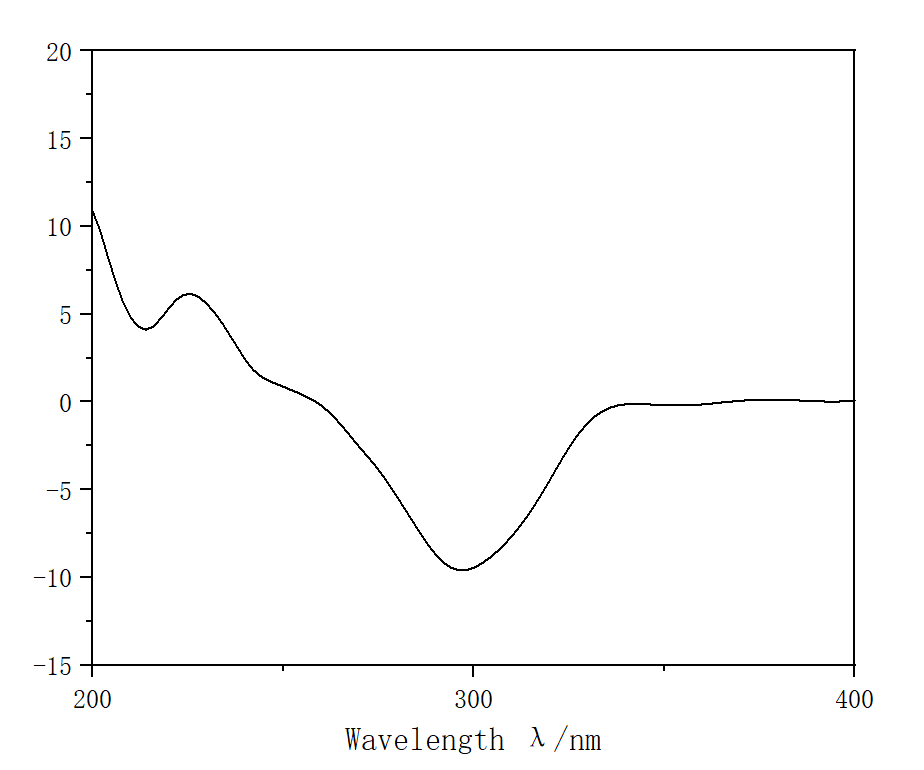


Fig. S21 Experimental ECD spectrum of 2a


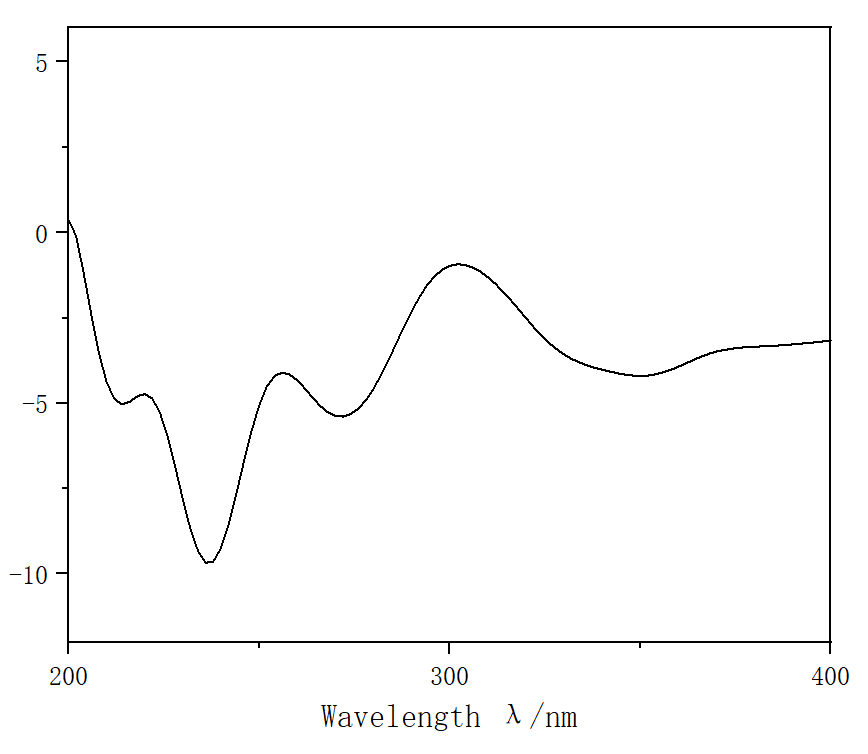


Fig. S22 Experimental ECD spectrum of 2b


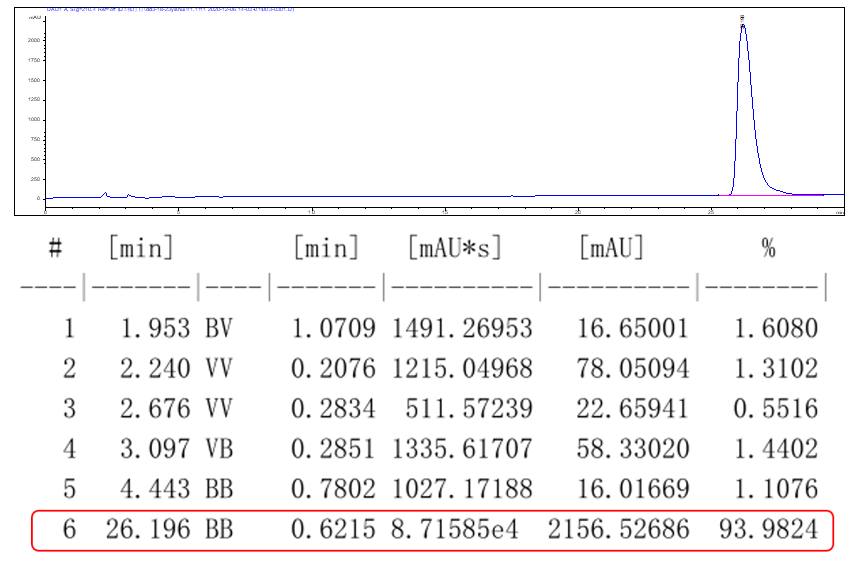


**Fig. S23** HPLC chromatographic profile and purity report of compound **2**


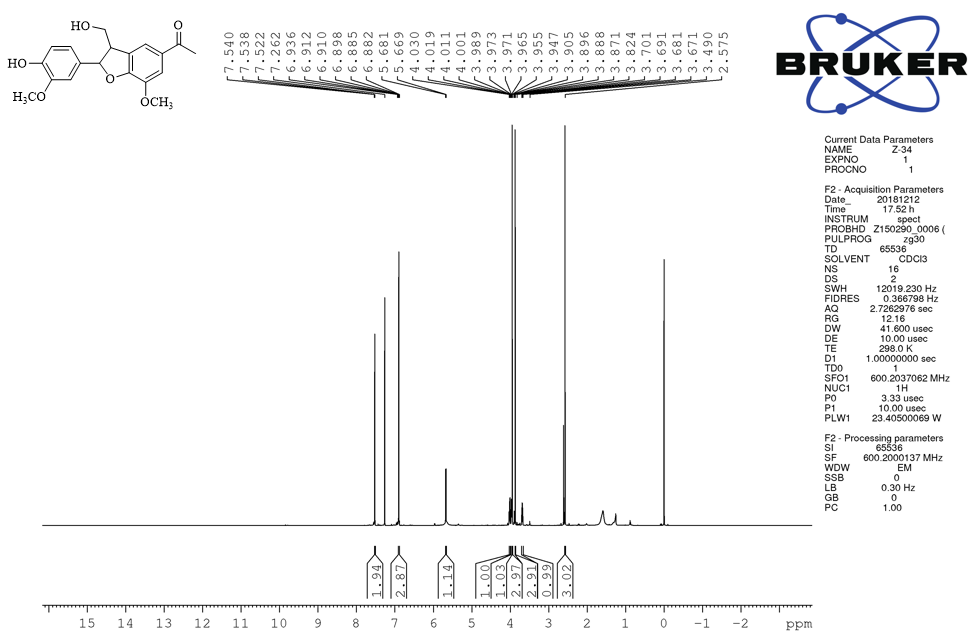


Fig. S24 1H-NMR spectrum of compound 3 (600MHz, CDCl3)


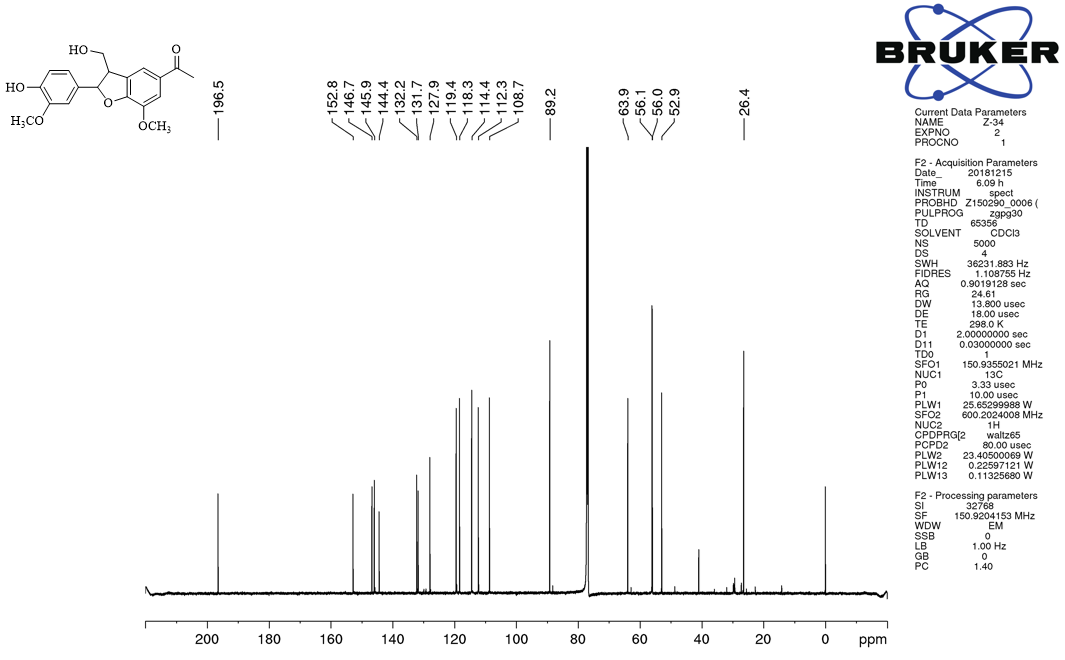


Fig. S25 13C-NMR spectrum of compound 3 (150MHz, CDCl3)


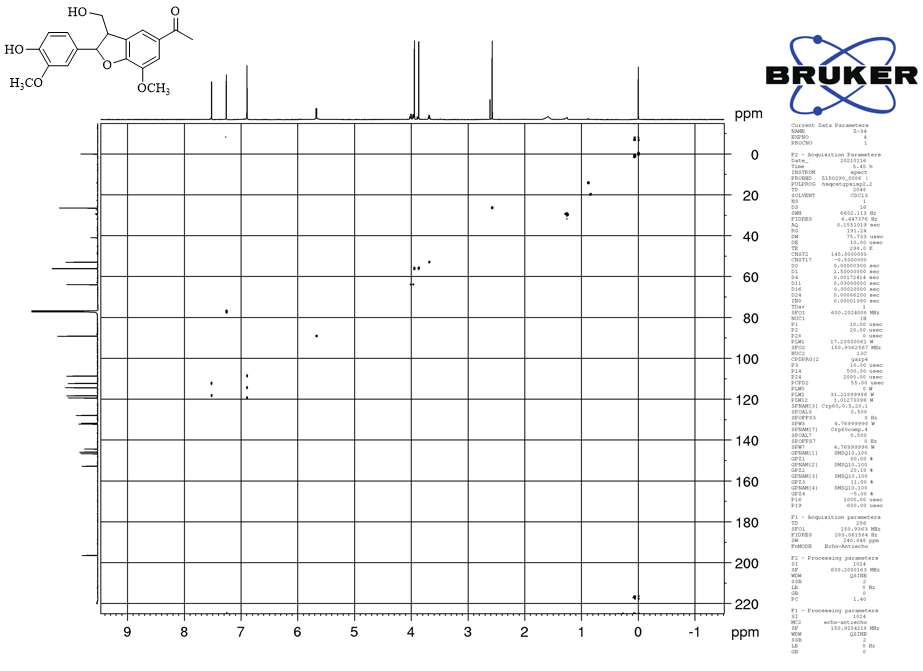


Fig. S26 HSQC spectrum of compound 3 (150MHz, CDCl3)


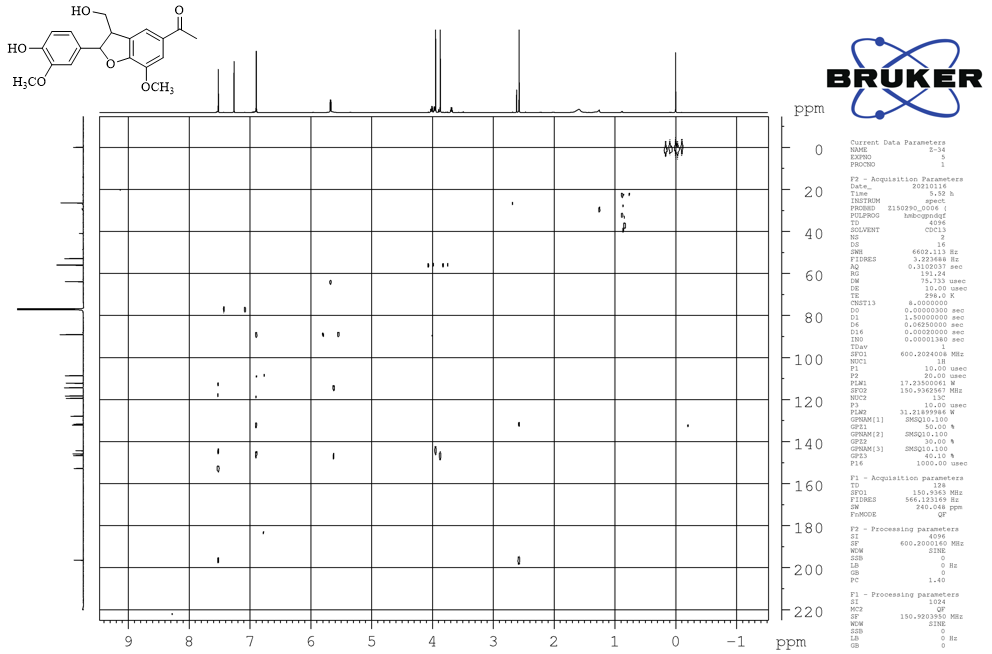


Fig. S27 HMBC spectrum of compound 3 (150MHz, CDCl3)


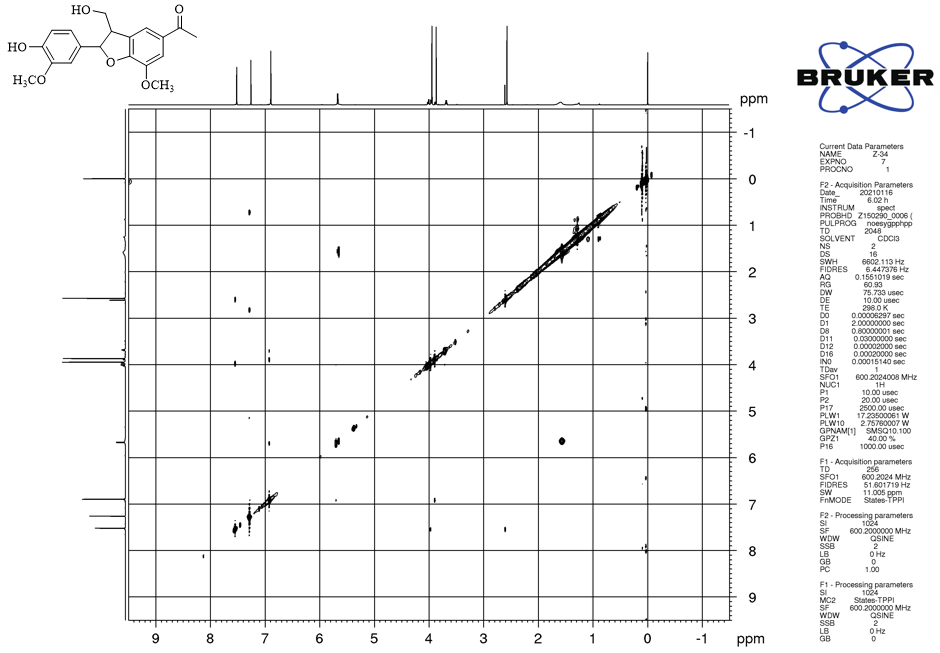


Fig. S28 NOESY spectrum of compound 3 (150MHz, CDCl3)


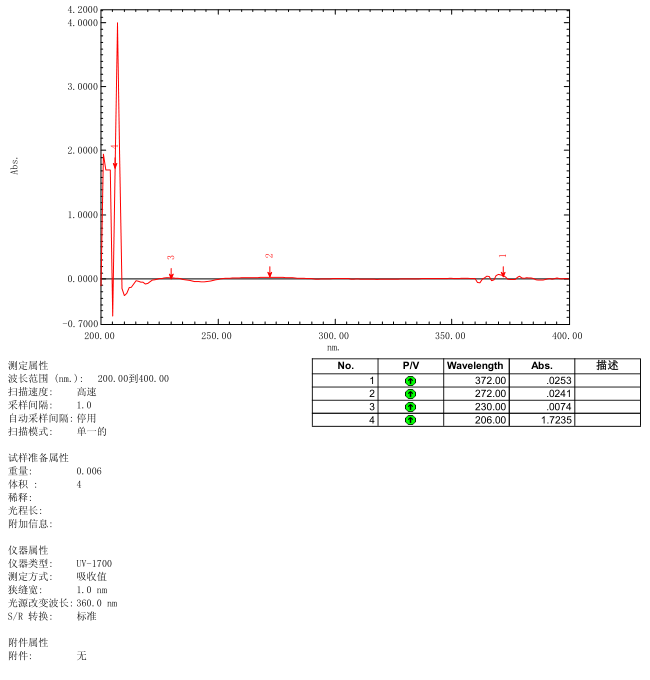


Fig. S29 UV spectrum of compound 3


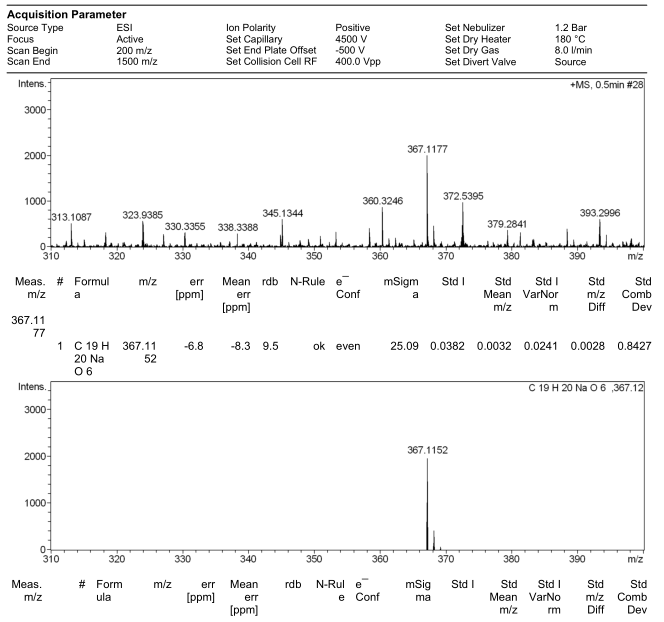


Fig. S30 MS spectrum of compound 3


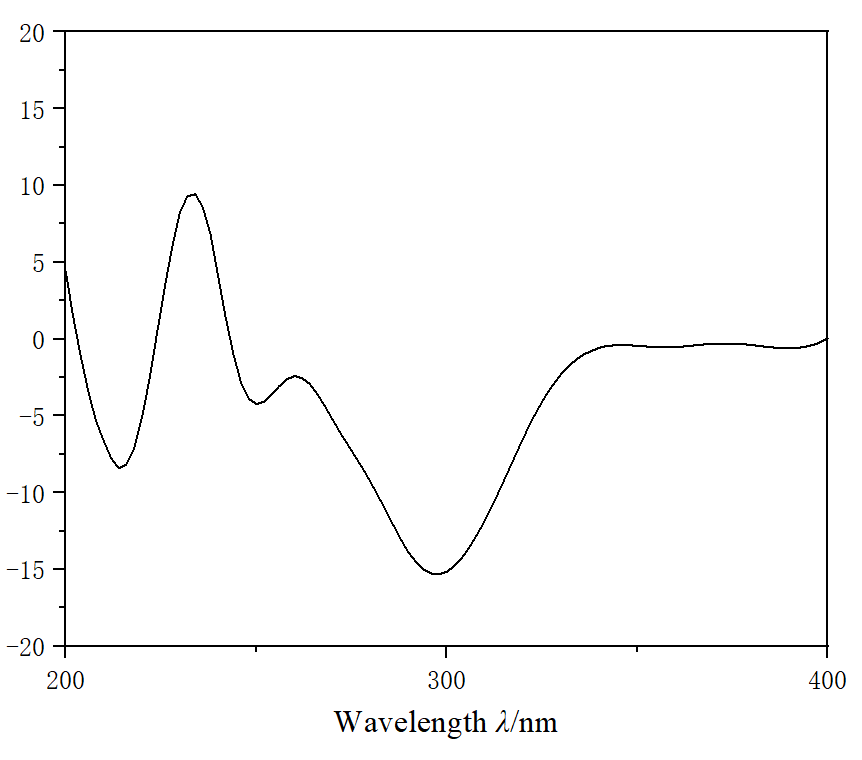


Fig. S31 Experimental ECD spectrum of 3a


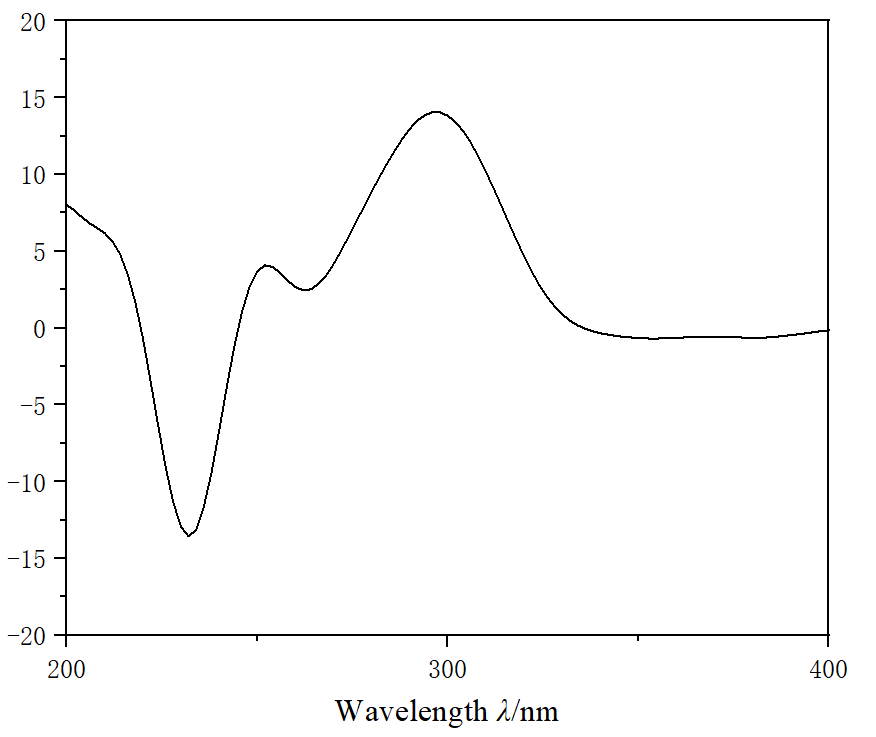


Fig. S32 Experimental ECD spectrum of 3b


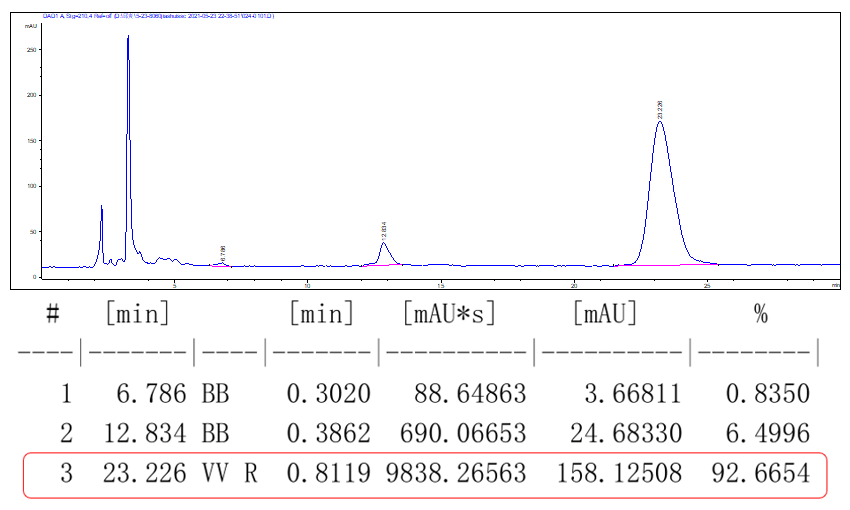


**Fig. S33** HPLC chromatographic profile and purity report of compound **3**


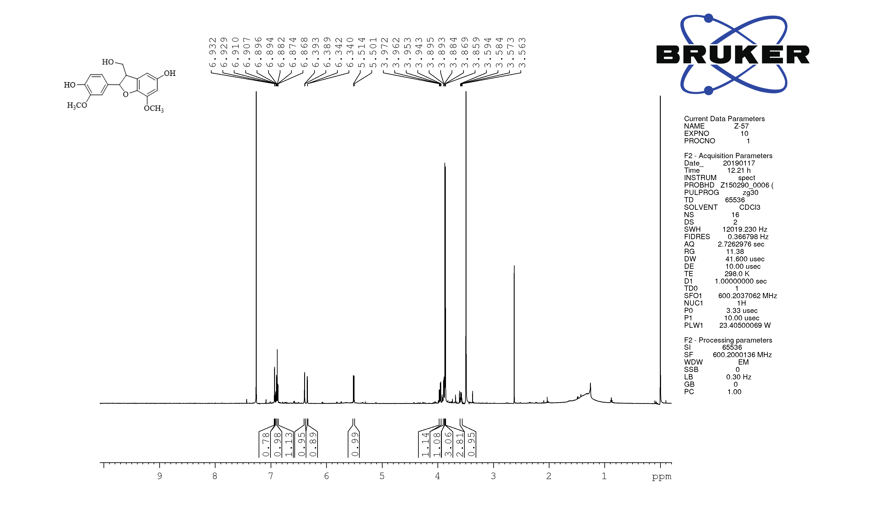


Fig. S34 1H-NMR spectrum of compound 4 (600MHz, CDCl3)


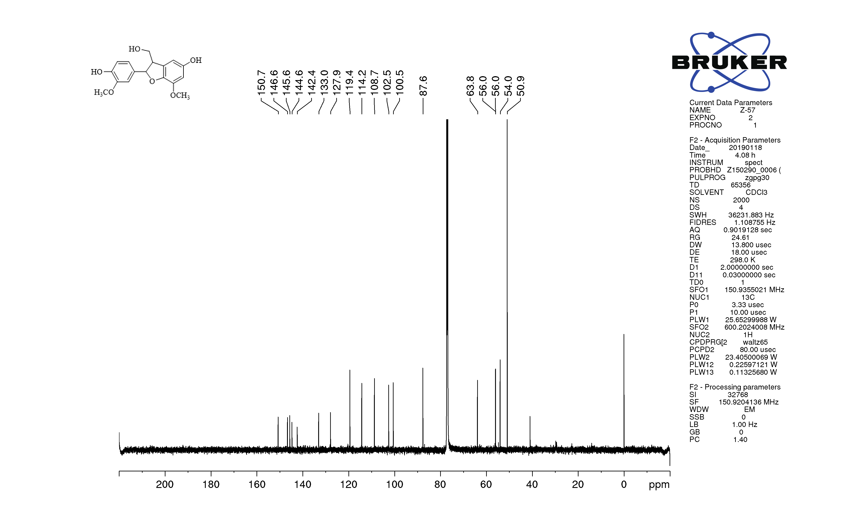


Fig. S35 13 C-NMR spectrum of compound 4 (150 MHz, CDCl3)


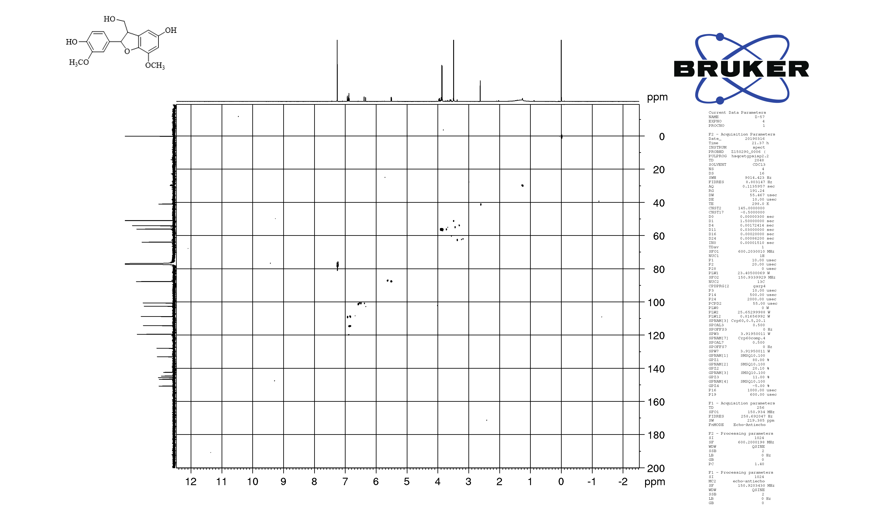


Fig. S36 HSQC spectrum of compound 4(150 MHz, CDCl3)


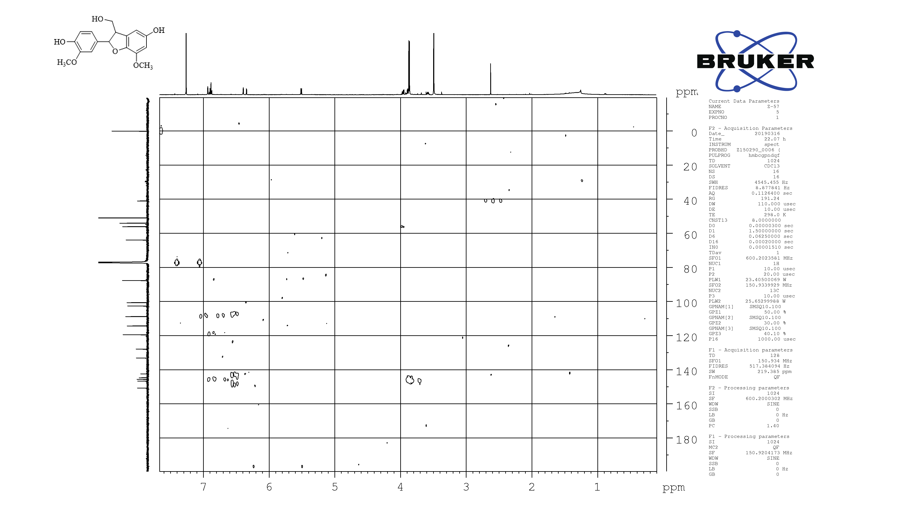


Fig. S37 HMBC spectrum of compound 4 (150MHz, CDCl3)


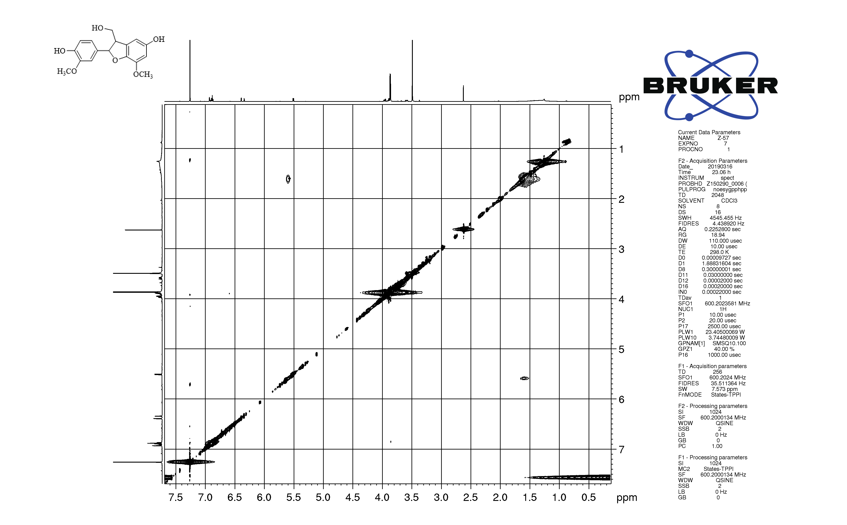


Fig. S38 NOESY spectrum of compound 4 (150MHz, CDCl3)


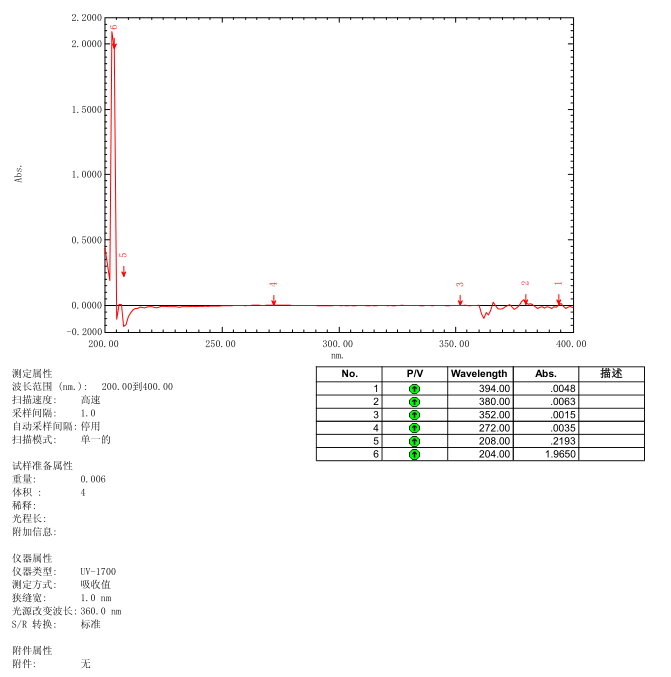


Fig. S39 UV spectrum of compound 4


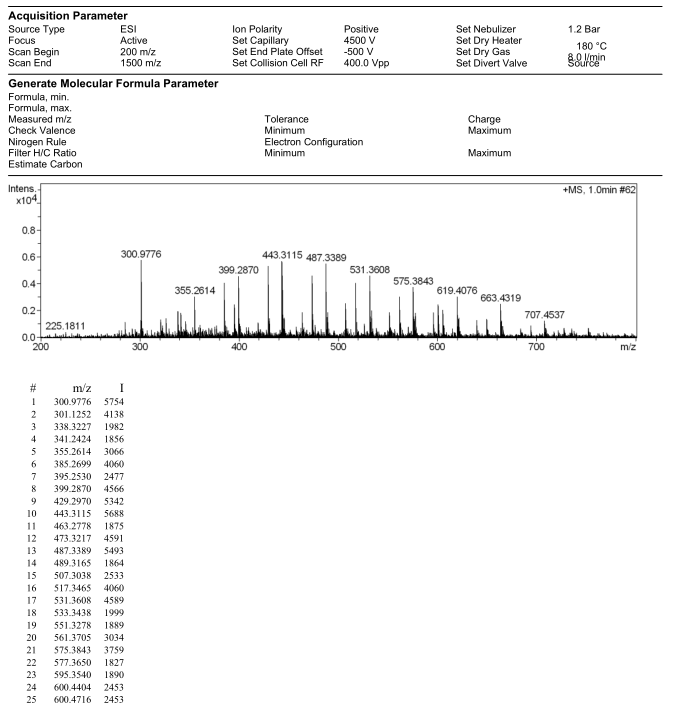


Fig. S40 UV spectrum of compound 4


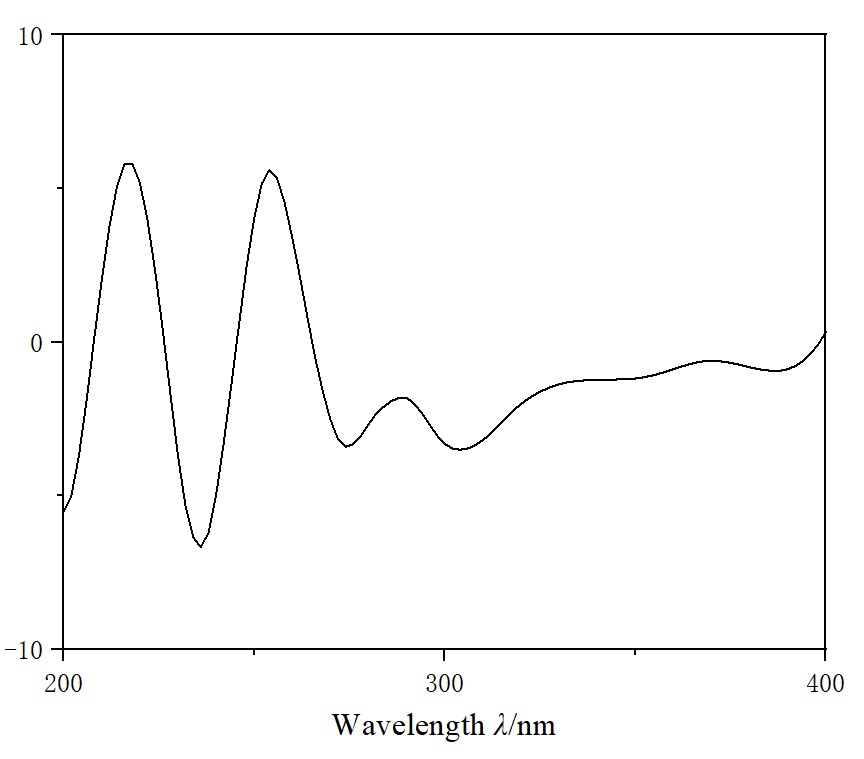


Fig. S41 Experimental ECD spectrum of 4a


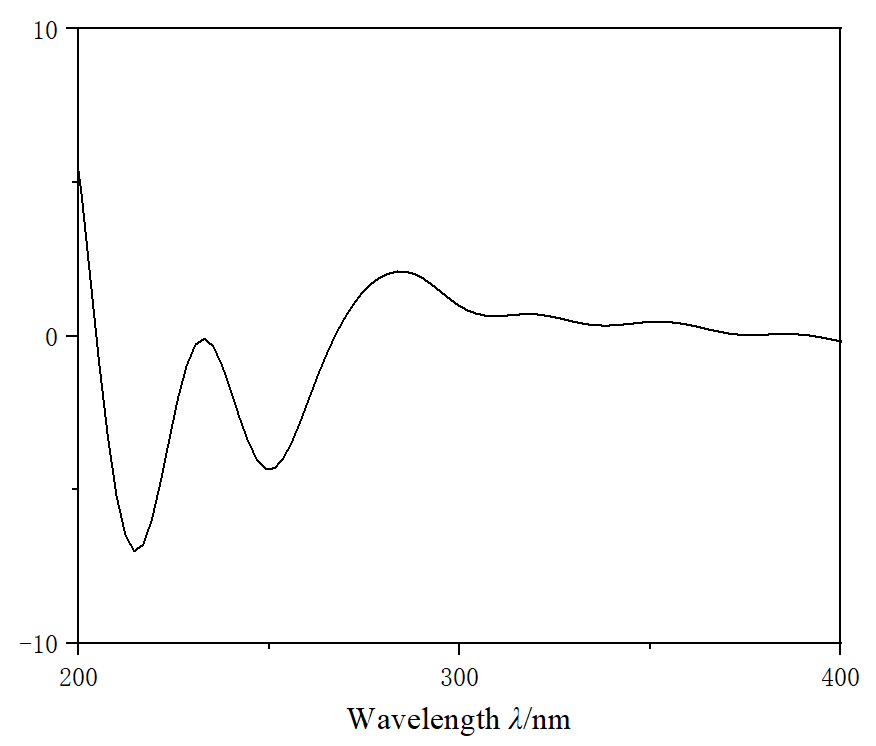


Fig. S42 Experimental ECD spectrum of 4b


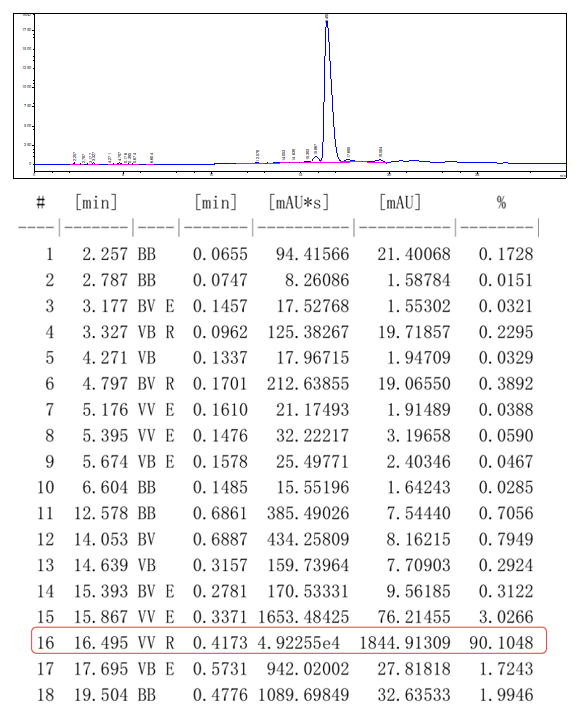


Fig. 43 HPLC chromatographic profile and purity report of compound 4
